# Supplementary material for: An Intergenerational Storytelling Program in Medical Education: A Mixed-Methods Evaluation
Source: Research Square preprint supplement (doi:10.21203/rs.3.rs-7255538/v1), 2025-09-17
Supplement: Supplementary file 1 [file ae1b71a515ac6eebb517d4dc.xlsx]

## Sheet: Theme-Combined MS&OA
Medical Students - Intervention	Theme (Total Excerpts = 136)	Valued time in curriculum for connecting with local community members in non-clinical settings (n=20)			Appreciated life story interviews as a method for empathy and compassion building, with a focus on self-reflection (n=46)		Welcomed the opportunity to actively reflect on unconscious biases (n=22)	More positive attitude towards older adults (n=10)	Desires to learn more about age-related challenges and health disparities (n=13)			Strengthened their connection to their purpose in pursuing medicine (n=15)
	Representative Quotes	- “I found that this class was the highlight of my week. I was always excited to attend both group discussions and 1:1 sessions with my partner, looking forward to great conversations including multigenerational perspectives. At the end of every session, I found myself leaving feeling inspired and refreshed. Conversations with my partner helped me see the bigger picture and take a step back from …	- “I think experiences like these are important for us as medical students because they allow us to interact with people who are more like our future patients and less like the people we normally interact with in our academic bubble.”	- “I feel it was a really valuable insight, as we don't always get to hear so directly from a well-represented population about what they like and don't like about healthcare. I really liked the points brought up about health professionals knowing who their patients are as people and honoring their lived experiences.”	- “I grew in my understanding of older adults and their views on the healthcare system and what aging means to them. I now have a newfound appreciation for how each individual's perception of their life can mean so many different things, and this impacts the way they view their current life, what matters to them, and what that means for the current and future trajectory of their lives.”	- “I purely love the intimacy of sharing stories - that I think learning about others is an act of love and trust and vulnerability. For me, the sessions have reminded me of the breadth of life and that moments which I find difficult right now will actually pass and will become something to laugh about or reflect on in the future. It adds perspective to my own life to be taken up to a place of li…	“Aging is sometimes viewed as a degenerative process because health and well-being seem to inevitably worsen with age. However, in talking with my 90-year-old partner during our individual sessions, I quickly found that this was a grossly inaccurate generalization…Learning that she started doing many of the things that bring joy and shape her identity later in life showed me how aging is not a pr…	- “I didn't necessarily have expectations of my partner going into our meeting, but I definitely didn't expect to click the way we did. I think people often assume that as you become older you lose excitement or passion for life, but my partner dispelled that assumption by sharing her love for things like cooking and travel – things we can all get excited about. I feel that even seemingly insurmo…	- “More guided conversation on health topics or health disparities faced by older adults.”	- “Some support in terms of how to handle potential memory problems. …in general, from a pure, even clinical skill perspective, that would be really fantastic to get some tips on because I tried to do my best to go through some of that stuff. How do you build that long relationship when it's really difficult to and when short term memory isn't maybe fully functional.”	-“I had that same experience where the same exact phrasing would be repeated the next week…so how to nudge them in a new direction or express that you know what they're talking about already in a way that's sensitive, appropriate.”	- “Part of what drew me to medicine in general is the importance of storytelling in doctor-patient relationships. I saw this class as an opportunity to strengthen that connection between the two while having a great experience with the residents at Belmont as a group and with my individual partner.”	- “I am just grateful for the amount of time we get to spend with our partners--it reminds me of why I went into medicine, why I love talking with people and learning about their lives. It is such a privilege to be here and to have people open up.”
Older Adults	Theme (Total OA interviewers = 11)	Value or appreciation overall in the intergenerational nature of the program (n=7)	Value in time spent with one medical student partner in individual interview sessions; Desire for more bidirectional conversations with partners (n=6)		Desire to talk about their medical topics and experiences in addition to their life stories (n=8)			Lack of clarity in program objectives; Interest in more organizational overview, aims, and expectations (n=3)			Frustrations over the acoustics and lighting of the conference room used for group sessions at Belmont Village. (n=4)		More positive attitude towards medical students and physicians. (n=3)
	Representative/Example Quotes	- “Both sides- the understanding between two people with years and years of difference, different points of view, how much you can agree on, and how much you can learn from each other. I think it’s very valuable that way. For these people who are going to be doctors, I think the idea of just learning to be acquainted with people much older than they are is helpful. Many of them haven’t been expos…	- “I really enjoyed the one on one because I think we both really expressed things. I said what had happened to me in my lifetime and what I enjoyed or what wasn't so good. Then [my partner] said hers and about what she had so far experienced and then what she wanted to experience going forward.”	- “I felt like the one-on-one made [the program] much more effective. Just easier to understand.”	- “Since all the student participants are in medical school, I think it would have been good to talk more about quality and compassion of care issues. Also, it would be interesting to discuss end-of-life issues..”	- “[Talking about] when we had been patients, what our feelings were when we were patients, when we had been hospitalized and how we were treated, what did we need, what needs were not met…might be more beneficial than this lovely free-flowing conversation.”	- “I think talking about getting old would be beneficial to all of us…it’s harder to adjust here for some people than others.”	- “All we do is chat back and forth and there's some benefit to that, obviously, to get to know the person, but [...] If a medical student takes a course in heart surgery, I assume they cut people open and see what's going to happen... Was [the purpose of this course] to tell these people that when they become doctors, they better treat us well or they better understand us? Or was it our job to t…	- “I didn't really understand the connection between hearing about my life and my physical health.”	- “I felt uncertainty with whether or not I should provide brief answers to interview questions, or be profound.”	- “The group sessions have had this problem with the acoustics and [lighting]...It took a lot away from maybe what we should have been concentrating on.”	- “Main problem was audio system - Hearing is a problem for senior people.”	- “Doctors are so busy, but this gives me so much hope to see these medical students showing so much compassion and wanting to provide this compassionate care and time to listen to us.”	- “I think medical doctors are so critically important to us because we go and pursue them when we're at our most vulnerable. We're sick …and we just rely so much on [them] to give us those answers and steer us in the right direction. That's a very, very important function, and I appreciate that you're interested in seeking dialogue about how to do it better. I applaud you for doing that.”
